# Supplementary material
Source: PubMed Central journal article supplement (PMC3483142)

## Supplementary Data

Supplementary Table 1: overview of all genes tested in RS1 and the number of SNPs

per gene

| <i>Gene (HGCNC)</i> | <i>Gene (2009)</i> | <i>Family</i> | <i>Chr</i> | <i>Start gene</i> | <i>End gene</i> | <i>Total SNPs</i> |
|---------------------|--------------------|---------------|------------|-------------------|-----------------|-------------------|
| HSPA6               | HSPA6              | HSP70         | 1          | 159760660         | 159763311       | 139               |
| HSPA4L              | <b>HSPH3</b>       | HSP70         | 4          | 128922903         | 128973976       | 84                |
| HSPA4               | <b>HSPH2</b>       | HSP70         | 5          | 132415561         | 132468608       | 138               |
| HSPA9               | HSPA9              | HSP70         | 5          | 137918923         | 137939014       | 129               |
| HSPA1L              | HSPA1L             | HSP70         | 6          | 31885375          | 31890786        |                   |
| HSPA1A              | HSPA1A             | HSP70         | 6          | 31891316          | 31893698        | 148               |
| HSPA1B              | HSPA1B             | HSP70         | 6          | 31903503          | 31906010        |                   |
| HSPA5               | HSPA5              | HSP70         | 9          | 127036953         | 127043430       | 79                |
| HSPA14              | HSPA14             | HSP70         | 10         | 14920267          | 14953746        | 161               |
| HSPA12A             | HSPA12A            | HSP70         | 10         | 118419930         | 118492786       | 304               |
| HYOU1               | <b>HSPH4</b>       | HSP70         | 11         | 118420110         | 118433122       | 122               |
| HSPA8               | HSPA8              | HSP70         | 11         | 122433410         | 122438054       | 218               |
| HSPH1               | HSPH1              | HSP70         | 13         | 30608762          | 30634117        | 263               |
| HSPA2               | HSPA2              | HSP70         | 14         | 64072376          | 64079708        | 118               |
| HSPA12B             | HSPA12B            | HSP70         | 20         | 3661356           | 3681758         | 203               |
| HSPA13              | HSPA13             | HSP70         | 21         | 14665307          | 14677380        | 277               |
| BAG2                | BAG2               | BAG           | 6          | 57145293          | 57157694        | 112               |
| BAG4                | BAG4               | BAG           | 8          | 38153263          | 38187694        | 65                |
| BAG1                | BAG1               | BAG           | 9          | 33242469          | 33254744        | 165               |
| BAG3                | BAG3               | BAG           | 10         | 121400872         | 121427321       | 164               |
| BAG5                | BAG5               | BAG           | 14         | 103092642         | 103098904       | 110               |
| DNAJA1              | DNAJA1             | HSP40-A       | 9          | 33015209          | 33029062        | 258               |
| DNAJA4              | DNAJA4             | HSP40-A       | 15         | 76343551          | 76361591        | 203               |
| DNAJA3              | DNAJA3             | HSP40-A       | 16         | 4415883           | 4446777         | 127               |
| DNAJA2              | DNAJA2             | HSP40-A       | 16         | 45547796          | 45565036        | 60                |
| DNAJB4              | DNAJB4             | HSP40-B       | 1          | 78243224          | 78255586        | 110               |
| DNAJB2              | DNAJB2             | HSP40-B       | 2          | 219852284         | 219859866       | 118               |
| DNAJB8              | DNAJB8             | HSP40-B       | 3          | 129663972         | 129668781       | 170               |
| DNAJB11             | DNAJB11            | HSP40-B       | 3          | 187771161         | 187786283       | 200               |
| DNAJB14             | DNAJB14            | HSP40-B       | 4          | 101039576         | 101086775       | 146               |
| DNAJB9              | DNAJB9             | HSP40-B       | 7          | 107997592         | 108002530       | 142               |
| DNAJB6              | DNAJB6             | HSP40-B       | 7          | 156822471         | 156902894       | 243               |
| DNAJB5              | DNAJB5             | HSP40-B       | 9          | 34979785          | 34988428        | 139               |
| DNAJB12             | DNAJB12            | HSP40-B       | 10         | 73762594          | 73784875        | 88                |
| DNAJB13             | DNAJB13            | HSP40-B       | 11         | 73339012          | 73358980        | 176               |
| DNAJB1              | DNAJB1             | HSP40-B       | 19         | 14486582          | 14490201        | 109               |
| DNAJB7              | DNAJB7             | HSP40-B       | 22         | 39585499          | 39588076        | 67                |
| DNAJC11             | DNAJC11            | HSP40-C       | 1          | 6616818           | 6684460         | 161               |
| DNAJC16             | DNAJC16            | HSP40-C       | 1          | 15725939          | 15770814        | 191               |
| DNAJC8              | DNAJC8             | HSP40-C       | 1          | 28399655          | 28432122        | 114               |
| DNAJC6              | DNAJC6             | HSP40-C       | 1          | 65503018          | 65654140        | 349               |
| DNAJC27             | DNAJC27            | HSP40-C       | 2          | 25020009          | 25048328        | 207               |
| DNAJC5G             | DNAJC5G            | HSP40-C       | 2          | 27351793          | 27357800        | 97                |
| DNAJC10             | DNAJC10            | HSP40-C       | 2          | 183289244         | 183351500       | 244               |
| DNAJC13             | DNAJC13            | HSP40-C       | 3          | 133619194         | 133740565       | 239               |
| DNAJC19             | DNAJC19            | HSP40-C       | 3          | 182184197         | 182190224       | 100               |
| GAK                 | <b>DNAJC26</b>     | HSP40-C       | 4          | 833065            | 916174          | 199               |

|              |                   |           |    |           |           |              |
|--------------|-------------------|-----------|----|-----------|-----------|--------------|
| DNAJC21      | DNAJC21           | HSP40-C   | 5  | 34965455  | 34994826  | 244          |
| DNAJC18      | DNAJC18           | HSP40-C   | 5  | 138775279 | 138803038 | 54           |
| SEC63        | <b>DNAJC23</b>    | HSP40-C   | 6  | 108298215 | 108386086 | 288          |
| DNAJC30      | DNAJC30           | HSP40-C   | 7  | 72733184  | 72735717  | 73           |
| DNAJC2       | DNAJC2            | HSP40-C   | 7  | 102740157 | 102772556 | 91           |
| DNAJC5B      | DNAJC5B           | HSP40-C   | 8  | 67096345  | 67175309  | 259          |
| DNAJC25      | DNAJC25           | HSP40-C   | 9  | 113433453 | 113456452 | 239          |
| DNAJC1       | DNAJC1            | HSP40-C   | 10 | 22085513  | 22332476  | 128          |
| DNAJC12      | DNAJC12           | HSP40-C   | 10 | 69226433  | 69267943  | 146          |
| DNAJC9       | DNAJC9            | HSP40-C   | 10 | 74672588  | 74677031  | 144          |
| DNAJC24      | DNAJC24           | HSP40-C   | 11 | 31347953  | 31410958  | 120          |
| DNAJC4       | DNAJC4            | HSP40-C   | 11 | 63746212  | 63757092  | 97           |
| DNAJC22      | DNAJC22           | HSP40-C   | 12 | 48027308  | 48031964  | 91           |
| DNAJC14      | DNAJC14           | HSP40-C   | 12 | 54501011  | 54509603  | 56           |
| SACS         | <b>DNAJC29</b>    | HSP40-C   | 13 | 22800966  | 22840626  | 289          |
| DNAJC15      | DNAJC15           | HSP40-C   | 13 | 42495362  | 42581306  | 348          |
| DNAJC3       | DNAJC3            | HSP40-C   | 13 | 95127484  | 95241285  | 159          |
| DNAJC17      | DNAJC17           | HSP40-C   | 15 | 38847363  | 38886947  | 110          |
| DNAJC7       | DNAJC7            | HSP40-C   | 17 | 37382006  | 37422956  | 91           |
| DNAJC5       | DNAJC5            | HSP40-C   | 20 | 61996962  | 62035839  | 135          |
| DNAJC28      | DNAJC28           | HSP40-C   | 21 | 33782108  | 33785893  | 105          |
| HSCB         | <b>DNAJC20</b>    | HSP40-C   | 22 | 27468043  | 27483498  | 125          |
| STIP1        | <b>Hop</b>        | CHIP-like | 11 | 63710248  | 63728591  | 133          |
| STUB1        | <b>CHIP</b>       | CHIP-like | 16 | 670116    | 672769    | 111          |
| ST13         | <b>Hip</b>        | CHIP-like | 22 | 39550545  | 39582633  | 95           |
| PFDN6L       | PFDN6L            | Prefoldin | 1  | 42774743  | 42892922  | 233          |
| PFDN2        | PFDN2             | Prefoldin | 1  | 159336970 | 159354490 | 114          |
| PFDN1        | PFDN1             | Prefoldin | 5  | 139604819 | 139662873 | 130          |
| PFDN6        | PFDN6             | Prefoldin | 6  | 33365356  | 33366689  | 129          |
| PFDN5        | PFDN5             | Prefoldin | 12 | 51975502  | 51979501  | 75           |
| PDRG1        | PDRG1             | Prefoldin | 20 | 29996419  | 30003544  | 107          |
| PFDN4        | PFDN4             | Prefoldin | 20 | 52257909  | 52269899  | 278          |
| <b>Total</b> | <b>(79 genes)</b> |           |    |           |           | <b>12053</b> |

Genes made bold in the second column are genes that are subjected to name-change for the new

HSP nomenclature.

Supplementary Table 2: All SNPs in *PFDN2*

| <i>Chr</i> | <i>ROI</i> | <i>SNP</i> | <i>Position</i> | <i>Location</i> | <i>Eff. allele</i> | <i>EAF</i> | <i>Rsq</i> | <i>P-val</i> | <i>OR (95% CI)</i> |
|------------|------------|------------|-----------------|-----------------|--------------------|------------|------------|--------------|--------------------|
| 1          | PFDN2      | rs2297221  | 159237592       | -99378          | G                  | 0,72       | 1,00       | 7,83E-03     | 1.25 (1.06-1.47)   |
| 1          | PFDN2      | rs2297220  | 159237639       | -99331          | G                  | 0,72       | 1,00       | 7,86E-03     | 1.25 (1.06-1.47)   |
| 1          | PFDN2      | rs790055   | 159237770       | -99200          | G                  | 0,79       | 1,00       | 4,25E-03     | 0.79 (0.66-0.93)   |
| 1          | PFDN2      | rs2247459  | 159242624       | -94346          | C                  | 0,72       | 1,00       | 7,88E-03     | 1.25 (1.06-1.47)   |
| 1          | PFDN2      | rs2481080  | 159242961       | -94009          | G                  | 0,72       | 1,00       | 7,89E-03     | 1.25 (1.06-1.47)   |
| 1          | PFDN2      | rs17388108 | 159244326       | -92644          | A                  | 0,72       | 1,00       | 7,91E-03     | 1.25 (1.06-1.47)   |
| 1          | PFDN2      | rs2247671  | 159244455       | -92515          | G                  | 0,72       | 1,00       | 7,92E-03     | 1.25 (1.06-1.47)   |
| 1          | PFDN2      | rs2481081  | 159245198       | -91772          | A                  | 0,72       | 1,00       | 7,93E-03     | 1.25 (1.06-1.47)   |
| 1          | PFDN2      | rs2247790  | 159245684       | -91286          | C                  | 0,72       | 1,00       | 7,95E-03     | 1.25 (1.06-1.47)   |
| 1          | PFDN2      | rs11807930 | 159248881       | -88089          | A                  | 0,72       | 1,00       | 7,97E-03     | 1.25 (1.06-1.47)   |
| 1          | PFDN2      | rs2039223  | 159252332       | -84638          | G                  | 0,79       | 1,00       | 4,19E-03     | 0.78 (0.66-0.93)   |
| 1          | PFDN2      | rs2481084  | 159256238       | -80732          | T                  | 0,72       | 1,00       | 5,33E-03     | 1.26 (1.07-1.49)   |
| 1          | PFDN2      | rs6695707  | 159258445       | -78525          | A                  | 0,86       | 0,99       | 7,87E-01     | 0.97 (0.80-1.19)   |
| 1          | PFDN2      | rs7546890  | 159262016       | -74954          | T                  | 0,51       | 1,00       | 8,72E-01     | 1.01 (0.88-1.17)   |
| 1          | PFDN2      | rs12030262 | 159267088       | -69882          | G                  | 0,51       | 1,00       | 8,65E-01     | 1.01 (0.88-1.17)   |
| 1          | PFDN2      | rs11576837 | 159270498       | -66472          | G                  | 0,61       | 1,00       | 8,65E-03     | 0.83 (0.72-0.95)   |
| 1          | PFDN2      | rs11265544 | 159272643       | -64327          | C                  | 0,33       | 1,00       | 9,66E-01     | 1.00 (0.86-1.16)   |
| 1          | PFDN2      | rs10908821 | 159275159       | -61811          | C                  | 0,87       | 0,96       | 5,54E-02     | 0.82 (0.67-1.01)   |
| 1          | PFDN2      | rs3737787  | 159276147       | -60823          | G                  | 0,72       | 0,98       | 4,48E-03     | 1.27 (1.08-1.50)   |
| 1          | PFDN2      | rs2073656  | 159277979       | -58991          | G                  | 0,72       | 0,98       | 4,48E-03     | 1.27 (1.08-1.50)   |
| 1          | PFDN2      | rs2774276  | 159278340       | -58630          | C                  | 0,74       | 0,98       | 5,42E-03     | 0.80 (0.68-0.94)   |
| 1          | PFDN2      | rs2073653  | 159279384       | -57586          | T                  | 0,87       | 1,00       | 9,36E-01     | 0.99 (0.81-1.21)   |
| 1          | PFDN2      | rs1556260  | 159281070       | -55900          | C                  | 0,87       | 1,00       | 9,37E-01     | 0.99 (0.81-1.21)   |
| 1          | PFDN2      | rs1556259  | 159281273       | -55697          | A                  | 0,87       | 1,00       | 9,37E-01     | 0.99 (0.81-1.21)   |
| 1          | PFDN2      | rs2516837  | 159281351       | -55619          | G                  | 0,61       | 0,99       | 1,09E-02     | 0.83 (0.72-0.96)   |
| 1          | PFDN2      | rs2774279  | 159284180       | -52790          | T                  | 0,33       | 1,00       | 9,63E-01     | 1.00 (0.86-1.17)   |
| 1          | PFDN2      | rs3813609  | 159285664       | -51306          | C                  | 0,61       | 0,99       | 1,09E-02     | 0.83 (0.72-0.96)   |
| 1          | PFDN2      | rs11588189 | 159286245       | -50725          | T                  | 0,33       | 1,00       | 9,62E-01     | 1.00 (0.87-1.17)   |
| 1          | PFDN2      | rs3813610  | 159289263       | -47707          | G                  | 0,61       | 0,98       | 1,10E-02     | 0.83 (0.72-0.96)   |
| 1          | PFDN2      | rs7516231  | 159292703       | -44267          | A                  | 0,87       | 0,99       | 9,43E-01     | 0.99 (0.81-1.22)   |
| 1          | PFDN2      | rs12130871 | 159293114       | -43856          | G                  | 0,32       | 0,98       | 7,48E-01     | 0.98 (0.84-1.14)   |
| 1          | PFDN2      | rs10737178 | 159294116       | -42854          | G                  | 0,92       | 1,00       | 5,69E-02     | 0.80 (0.63-1.01)   |
| 1          | PFDN2      | rs7556492  | 159295759       | -41211          | T                  | 0,87       | 0,98       | 9,77E-01     | 1.00 (0.81-1.23)   |
| 1          | PFDN2      | rs17384360 | 159297430       | -39540          | T                  | 0,71       | 0,94       | 1,43E-02     | 1.23 (1.04-1.46)   |
| 1          | PFDN2      | rs4617422  | 159303096       | -33874          | G                  | 0,87       | 0,95       | 9,12E-01     | 1.01 (0.82-1.25)   |
| 1          | PFDN2      | rs10797092 | 159303666       | -33304          | C                  | 0,79       | 1,00       | 4,78E-04     | 0.75 (0.63-0.88)   |
| 1          | PFDN2      | rs16832617 | 159304481       | -32489          | A                  | 0,87       | 0,93       | 8,08E-01     | 1.03 (0.83-1.27)   |
| 1          | PFDN2      | rs12118313 | 159304603       | -32367          | A                  | 0,78       | 0,99       | 1,21E-04     | 0.73 (0.62-0.86)   |
| 1          | PFDN2      | rs6671492  | 159305391       | -31579          | C                  | 0,78       | 1,00       | 5,28E-04     | 0.75 (0.64-0.88)   |
| 1          | PFDN2      | rs12116949 | 159308687       | -28283          | A                  | 0,28       | 0,87       | 7,48E-01     | 0.97 (0.82-1.15)   |
| 1          | PFDN2      | rs4656285  | 159310359       | -26611          | C                  | 0,75       | 1,00       | 2,38E-03     | 0.78 (0.67-0.92)   |
| 1          | PFDN2      | rs4656978  | 159310388       | -26582          | A                  | 0,75       | 1,00       | 2,39E-03     | 0.78 (0.67-0.92)   |
| 1          | PFDN2      | rs4559524  | 159311752       | -25218          | G                  | 0,88       | 1,00       | 4,13E-02     | 0.81 (0.65-0.99)   |
| 1          | PFDN2      | rs11265548 | 159313844       | -23126          | T                  | 0,89       | 0,99       | 4,07E-02     | 0.80 (0.65-0.99)   |
| 1          | PFDN2      | rs3820097  | 159315982       | -20988          | A                  | 0,88       | 0,98       | 1,69E-01     | 0.86 (0.70-1.06)   |
| 1          | PFDN2      | rs1467742  | 159317475       | -19495          | G                  | 0,88       | 0,98       | 1,69E-01     | 0.86 (0.70-1.06)   |
| 1          | PFDN2      | rs1556257  | 159317758       | -19212          | C                  | 0,75       | 0,97       | 2,08E-03     | 0.78 (0.66-0.91)   |
| 1          | PFDN2      | rs11265549 | 159318150       | -18820          | G                  | 0,88       | 0,99       | 1,64E-01     | 0.86 (0.70-1.06)   |
| 1          | PFDN2      | rs12401309 | 159318182       | -18788          | T                  | 0,92       | 0,97       | 6,59E-02     | 0.80 (0.63-1.02)   |
| 1          | PFDN2      | rs3892376  | 159320397       | -16573          | C                  | 0,87       | 1,00       | 5,71E-02     | 0.83 (0.68-1.01)   |

|   |       |            |           |          |   |      |      |          |                  |
|---|-------|------------|-----------|----------|---|------|------|----------|------------------|
| 1 | PFDN2 | rs3892375  | 159320678 | -16292   | C | 0,27 | 0,98 | 9,53E-01 | 1.00 (0.85-1.17) |
| 1 | PFDN2 | rs4233364  | 159320847 | -16123   | A | 0,89 | 0,98 | 1,58E-01 | 0.86 (0.70-1.06) |
| 1 | PFDN2 | rs10159127 | 159323242 | -13728   | A | 0,26 | 0,90 | 6,79E-01 | 1.04 (0.88-1.23) |
| 1 | PFDN2 | rs11590097 | 159323613 | -13357   | G | 0,88 | 0,88 | 4,11E-02 | 0.80 (0.64-0.99) |
| 1 | PFDN2 | rs14111614 | 159324533 | -12437   | G | 0,26 | 0,87 | 8,87E-01 | 1.01 (0.85-1.20) |
| 1 | PFDN2 | rs11265550 | 159327014 | -9956    | A | 0,46 | 0,88 | 3,17E-02 | 1.18 (1.01-1.37) |
| 1 | PFDN2 | rs4656287  | 159330632 | -6338    | T | 0,91 | 0,99 | 6,88E-02 | 0.81 (0.64-1.02) |
| 1 | PFDN2 | rs11576830 | 159335460 | -1510    | C | 0,29 | 1,00 | 5,04E-01 | 1.06 (0.90-1.23) |
| 1 | PFDN2 | rs4078017  | 159340716 | intronic | G | 0,91 | 0,96 | 3,79E-02 | 0.79 (0.63-0.99) |
| 1 | PFDN2 | rs4656289  | 159341216 | intronic | C | 0,91 | 0,96 | 3,79E-02 | 0.79 (0.63-0.99) |
| 1 | PFDN2 | rs4233365  | 159341225 | intronic | A | 0,39 | 0,99 | 3,98E-02 | 1.16 (1.01-1.34) |
| 1 | PFDN2 | rs4347230  | 159341253 | intronic | A | 0,39 | 0,99 | 4,00E-02 | 1.16 (1.01-1.34) |
| 1 | PFDN2 | rs4656985  | 159345779 | intronic | C | 0,39 | 0,99 | 4,06E-02 | 1.16 (1.01-1.34) |
| 1 | PFDN2 | rs11265554 | 159350631 | intronic | C | 0,39 | 0,99 | 4,07E-02 | 1.16 (1.01-1.34) |
| 1 | PFDN2 | rs4523530  | 159351397 | intronic | T | 0,39 | 0,99 | 3,81E-02 | 1.17 (1.01-1.35) |
| 1 | PFDN2 | rs17389237 | 159359385 | 4895     | A | 0,91 | 0,97 | 3,97E-02 | 0.79 (0.63-0.99) |
| 1 | PFDN2 | rs1135783  | 159360814 | 6324     | A | 0,91 | 0,97 | 3,98E-02 | 0.79 (0.63-0.99) |
| 1 | PFDN2 | rs12727614 | 159363865 | 9375     | A | 0,25 | 1,00 | 3,19E-01 | 1.09 (0.92-1.28) |
| 1 | PFDN2 | rs7517289  | 159368514 | 14024    | C | 0,37 | 0,97 | 7,17E-03 | 1.22 (1.06-1.41) |
| 1 | PFDN2 | rs10797093 | 159370069 | 15579    | G | 0,27 | 0,99 | 1,22E-01 | 1.13 (0.97-1.33) |
| 1 | PFDN2 | rs4288617  | 159370646 | 16156    | A | 0,38 | 0,95 | 7,64E-03 | 1.22 (1.05-1.41) |
| 1 | PFDN2 | rs11265558 | 159373805 | 19315    | G | 0,36 | 1,00 | 8,11E-03 | 1.22 (1.05-1.40) |
| 1 | PFDN2 | rs10908824 | 159378555 | 24065    | G | 0,26 | 1,00 | 3,27E-01 | 1.08 (0.92-1.27) |
| 1 | PFDN2 | rs10732962 | 159381939 | 27449    | G | 0,36 | 1,00 | 8,08E-03 | 1.22 (1.05-1.4)  |
| 1 | PFDN2 | rs4656988  | 159389527 | 35037    | A | 0,36 | 1,00 | 8,05E-03 | 1.22 (1.05-1.41) |
| 1 | PFDN2 | rs12031437 | 159393599 | 39109    | G | 0,36 | 1,00 | 8,05E-03 | 1.22 (1.05-1.41) |
| 1 | PFDN2 | rs3402     | 159402045 | 47555    | T | 0,10 | 0,88 | 9,45E-01 | 1.01 (0.78-1.31) |
| 1 | PFDN2 | rs2502806  | 159402183 | 47693    | G | 0,57 | 0,91 | 1,34E-02 | 1.21 (1.04-1.41) |
| 1 | PFDN2 | rs2301286  | 159402848 | 48358    | A | 0,36 | 0,99 | 7,89E-03 | 1.22 (1.05-1.41) |
| 1 | PFDN2 | rs6779     | 159408056 | 53566    | G | 0,26 | 0,99 | 3,27E-01 | 1.09 (0.92-1.28) |
| 1 | PFDN2 | rs3813619  | 159410425 | 55935    | G | 0,93 | 1,00 | 2,41E-01 | 0.86 (0.67-1.11) |
| 1 | PFDN2 | rs3813620  | 159411629 | 57139    | C | 0,91 | 1,00 | 4,48E-02 | 0.79 (0.63-1.00) |
| 1 | PFDN2 | rs17392570 | 159414395 | 59905    | A | 0,92 | 0,99 | 1,83E-02 | 0.76 (0.60-0.95) |
| 1 | PFDN2 | rs4575098  | 159422016 | 67526    | A | 0,22 | 0,98 | 4,05E-01 | 1.08 (0.91-1.27) |
| 1 | PFDN2 | rs4233366  | 159425771 | 71281    | C | 0,75 | 1,00 | 7,82E-01 | 1.02 (0.87-1.20) |
| 1 | PFDN2 | rs7512012  | 159428797 | 74307    | A | 0,58 | 1,00 | 2,21E-02 | 1.19 (1.03-1.37) |
| 1 | PFDN2 | rs4233367  | 159429661 | 75171    | C | 0,58 | 1,00 | 2,06E-02 | 1.19 (1.03-1.38) |
| 1 | PFDN2 | rs4589131  | 159434322 | 79832    | G | 0,57 | 0,98 | 4,17E-02 | 1.16 (1.01-1.35) |
| 1 | PFDN2 | rs3813623  | 159435789 | 81299    | G | 0,87 | 1,00 | 5,25E-01 | 0.94 (0.77-1.15) |
| 1 | PFDN2 | rs3813624  | 159437601 | 83111    | C | 0,87 | 1,00 | 5,28E-01 | 0.94 (0.77-1.15) |
| 1 | PFDN2 | rs10908826 | 159439149 | 84659    | C | 0,87 | 1,00 | 5,29E-01 | 0.94 (0.77-1.15) |
| 1 | PFDN2 | rs4656993  | 159442761 | 88271    | G | 0,57 | 0,98 | 4,37E-02 | 1.16 (1.00-1.34) |
| 1 | PFDN2 | rs16832694 | 159443430 | 88940    | A | 0,92 | 1,00 | 4,01E-02 | 0.79 (0.63-0.99) |
| 1 | PFDN2 | rs3924264  | 159445308 | 90818    | C | 0,35 | 1,00 | 7,28E-01 | 1.03 (0.89-1.19) |
| 1 | PFDN2 | rs4656994  | 159446501 | 92011    | G | 0,78 | 1,00 | 6,23E-02 | 0.86 (0.73-1.01) |
| 1 | PFDN2 | rs11576415 | 159448832 | 94342    | G | 0,10 | 0,99 | 4,49E-01 | 1.10 (0.87-1.39) |
| 1 | PFDN2 | rs10797094 | 159449296 | 94806    | A | 0,57 | 1,00 | 5,64E-02 | 1.15 (1.00-1.33) |
| 1 | PFDN2 | rs1136207  | 159450140 | 95650    | C | 0,87 | 1,00 | 5,89E-01 | 0.95 (0.77-1.16) |
| 1 | PFDN2 | rs11587213 | 159451499 | 97009    | G | 0,19 | 1,00 | 3,93E-02 | 1.20 (1.01-1.43) |
| 1 | PFDN2 | rs12094497 | 159452927 | 98437    | A | 0,10 | 0,99 | 4,58E-01 | 1.09 (0.86-1.38) |
| 1 | PFDN2 | rs2070902  | 159454289 | 99799    | C | 0,76 | 1,00 | 8,62E-01 | 1.02 (0.86-1.20) |

Chr: chromosome; ROI: Region of Interest; Eff. allele; Effective allele, Rsq: imputation quality value; P-

val: p-value; OR (95% CI); Odds ratio (95% confidence interval)

Supplementary Figure 1:  $-\log(p\text{-values})$  of all SNPs tested. Each gene tested is a bar.  
1a: HSP70 genes

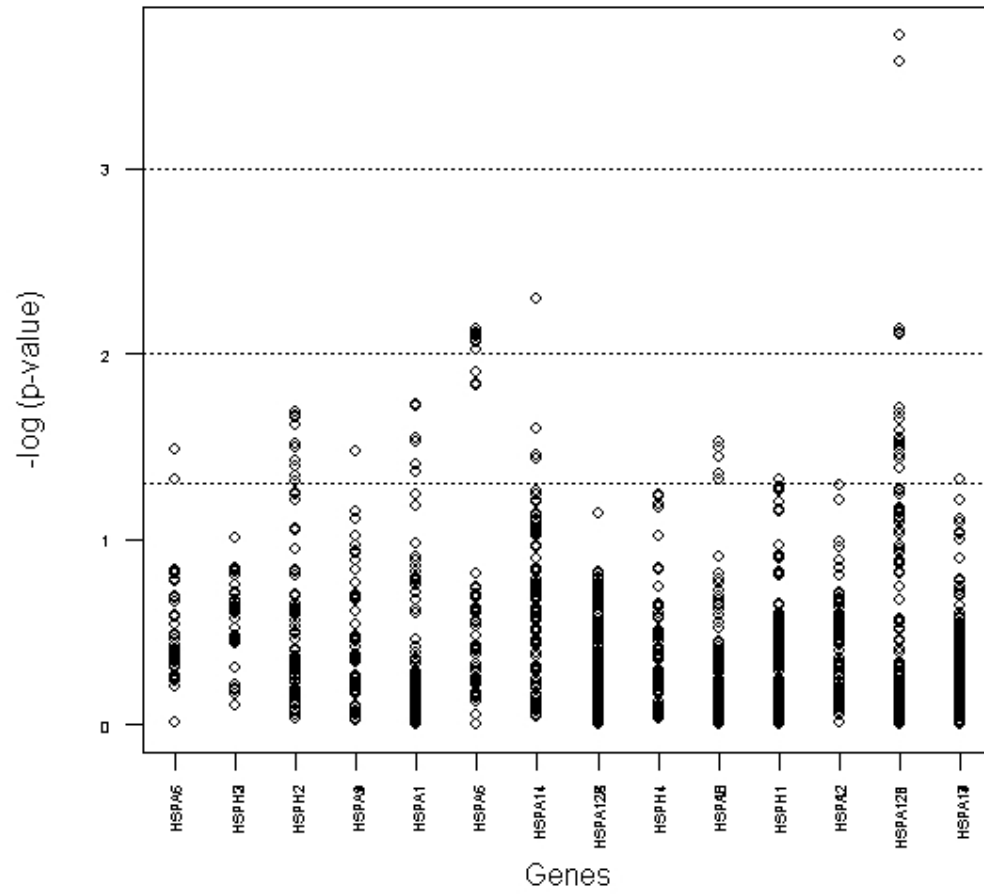

1b: HSP40 genes, ordered on subclass A, B and C

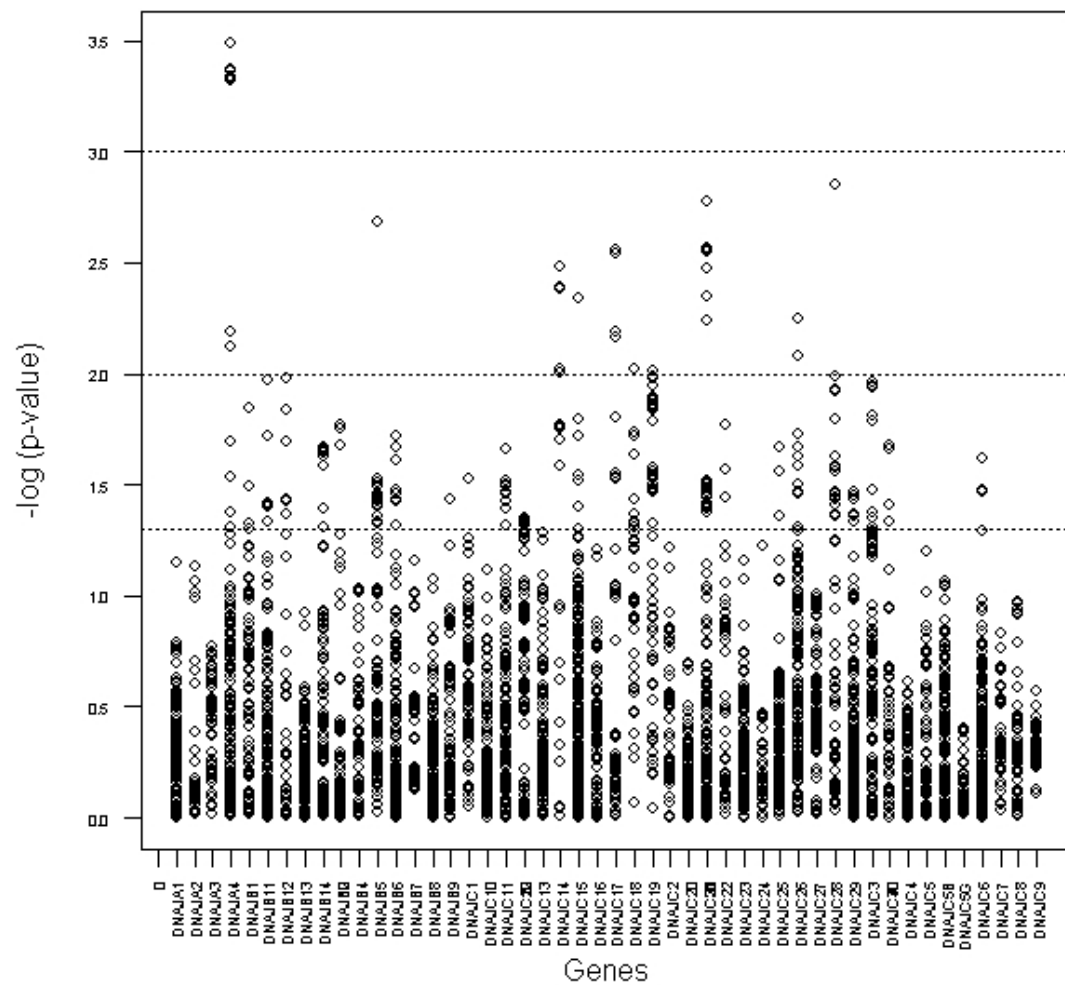

1c: BAG genes, CHIP-like genes and Prefoldin genes.

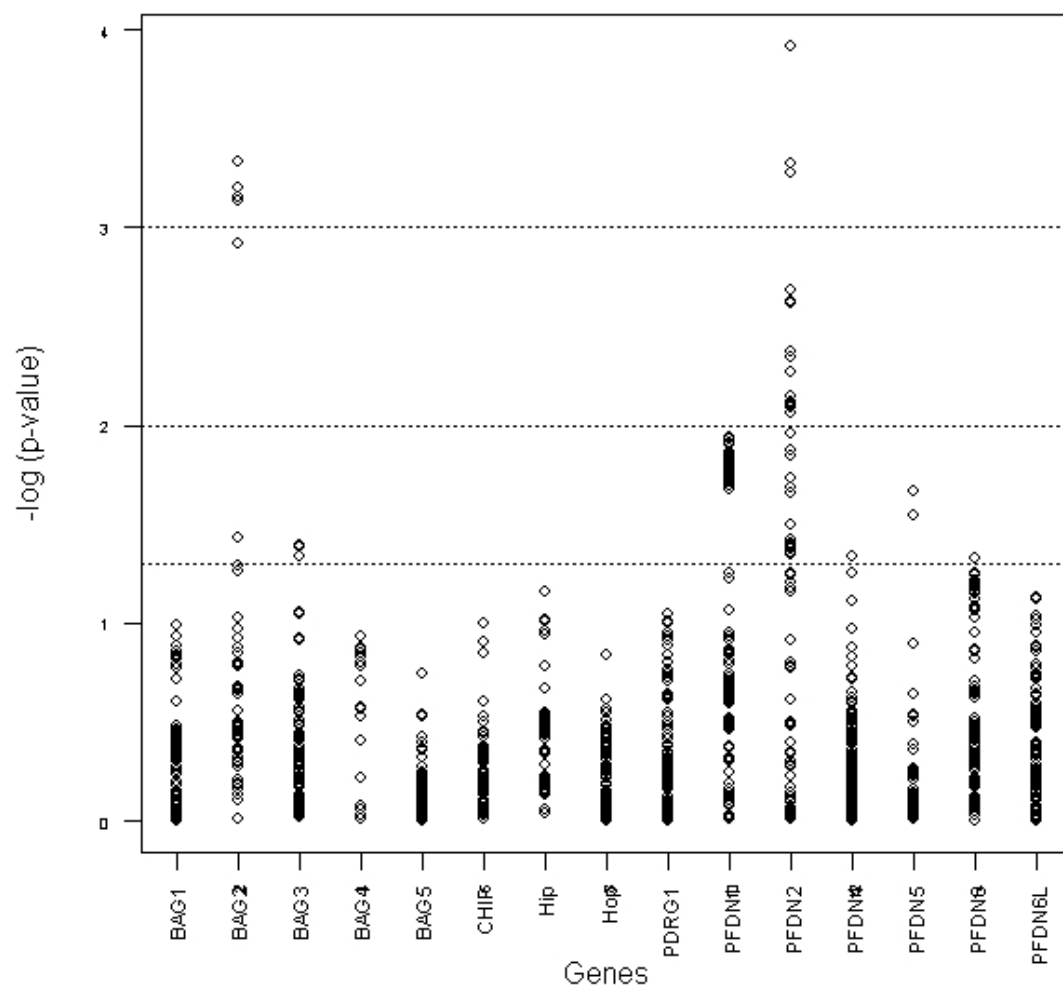

Supplement: NIHMS330011-supplement-01.pdf [file NIHMS330011-supplement-01.pdf]
